# Supplementary material for: Prognostic Implication of Right Ventricle Parameters Measured on Preoperative Cardiac MRI in Patients with Functional Tricuspid Regurgitation
Source: PubMed Central journal article supplement — Korean J Radiol. 2021 Apr 23;22(8):1253–65. doi: 10.3348/kjr.2020.1084 (PMC8316784; doi:10.3348/kjr.2020.1084), 2021-04-23
Supplement: kjr-22-1253-s001.pdf [file kjr-22-1253-s001.pdf]

## SUPPLEMENT

**Supplementary Table 1. MACCE**

| MACCE (n = 40)                         | Patients |
|----------------------------------------|----------|
| At 1 month (n = 8)                     |          |
| Myocardial infarction                  | 1        |
| Stroke                                 | 2        |
| Procedural complication                | 1        |
| Rehospitalization due to cardiac cause | 1        |
| Cardiac death                          | 3        |
| At 6 months (n = 4)                    |          |
| Rehospitalization due to cardiac cause | 3        |
| Cardiac death                          | 1        |
| At 1 year (n = 4)                      |          |
| Stroke                                 | 2        |
| Death                                  | 1        |
| Cardiac death                          | 1        |
| At 2 years (n = 6)                     |          |
| Stroke                                 | 2        |
| Major bleeding                         | 1        |
| Rehospitalization due to cardiac cause | 2        |
| Death                                  | 1        |
| At 4 years (n = 5)                     |          |
| Stroke                                 | 1        |
| Major bleeding                         | 1        |
| Rehospitalization due to cardiac cause | 2        |
| Death                                  | 1        |
| At 6 years (n = 9)                     |          |
| Stroke                                 | 1        |
| Rehospitalization due to cardiac cause | 4        |
| Death                                  | 4        |
| At 8 years (n = 3)                     |          |
| Stroke                                 | 1        |
| Death                                  | 2        |
| At 10 years (n = 1)                    |          |
| Death                                  | 1        |

MACCE = major adverse cardiac and cerebrovascular event
