# Supplementary material for: Prognostic Implication of Right Ventricle Parameters Measured on Preoperative Cardiac MRI in Patients with Functional Tricuspid Regurgitation
Source: PubMed Central journal article supplement — Korean J Radiol. 2021 Apr 23;22(8):1253–65. doi: 10.3348/kjr.2020.1084 (PMC8316784; doi:10.3348/kjr.2020.1084), 2021-04-23
Supplement: kjr-22-1253-s002.pdf [file kjr-22-1253-s002.pdf]

**Supplementary Table 2. Operation-Related Results and Outcomes**

|                                    | Total (n = 78)      | Isolated TV Surgery (n = 29) | Concomitant (n = 49) | P       |
|------------------------------------|---------------------|------------------------------|----------------------|---------|
| <b>Operative result</b>            |                     |                              |                      |         |
| Total operative time, hr           | 6.3 (5.5–7.4)       | 6.2 (4.8–7.2)                | 6.4 (5.7–7.8)        | 0.01    |
| Cardiopulmonary bypass time, min   | 153.0 (106.5–190.0) | 129.0 (79.5–180.8)           | 170.0 (139.5–202.5)  | < 0.001 |
| Aortic cross-clamp time, min       | 98.0 (78.5–125.0)   | 59.0 (37.0–81.0)             | 110.5 (86.3–132.0)   | < 0.001 |
| RBC transfusion, unit              | 2.0 (0.0–3.0)       | 1.0 (0.0–3.0)                | 2.0 (0.0–3.0)        | 0.19    |
| ICU duration, day                  | 1.0 (1.0–3.0)       | 1.0 (0.0–1.5)                | 1.0 (1.0–3.8)        | 0.001   |
| In-hospital stay, day              | 9.0 (7.0–15.0)      | 7.0 (5.5–11.0)               | 10.5 (8.0–15.8)      | 0.003   |
| <b>Outcomes</b>                    |                     |                              |                      |         |
| In-hospital mortality <sup>†</sup> | 3 (3.8)             | 0 (0.0)                      | 3 (6.1)              | 0.29    |
| Stroke                             | 9 (11.5)            | 3 (10.3)                     | 6 (12.2)             | 1.00    |
| Re-exploration for bleeding        | 3 (3.8)             | 0 (0.0)                      | 3 (6.1)              | 0.29    |
| AKI requiring dialysis             | 6 (7.7)             | 1 (3.4)                      | 5 (10.2)             | 0.40    |
| Cardiogenic shock requiring ECMO   | 5 (6.4)             | 1 (3.4)                      | 4 (8.2)              | 0.65    |
| Permanent pacemaker insertion      | 3 (3.8)             | 1 (3.4)                      | 2 (4.1)              | 1.00    |
| Prolonged ventilation <sup>‡</sup> | 13 (16.7)           | 2 (6.9)                      | 11 (22.4)            | 0.12    |
| Any infection*                     | 3 (3.8)             | 1 (3.4)                      | 2 (4.1)              | 1.00    |

Data are median and interquartile range, or number with percentage in parentheses. \*Including pneumonia and wound site infection, †Mortality within 30 days in a hospitalized patient, ‡Over the 24 hours of the postoperative intubation state. AKI = acute kidney injury, ECMO = extracorporeal membrane oxygenation, ICU = intensive care unit, RBC = red blood cell, TV = tricuspid valve
